# Supplementary material for: BTLA Expression in CLL: Epigenetic Regulation and Impact on CLL B Cell Proliferation and Ability to IL-4 Production
Source: MDPI journal article supplement (doi:10.3390/cells10113009), 2021-11-04
Supplement: s1 [file s1]

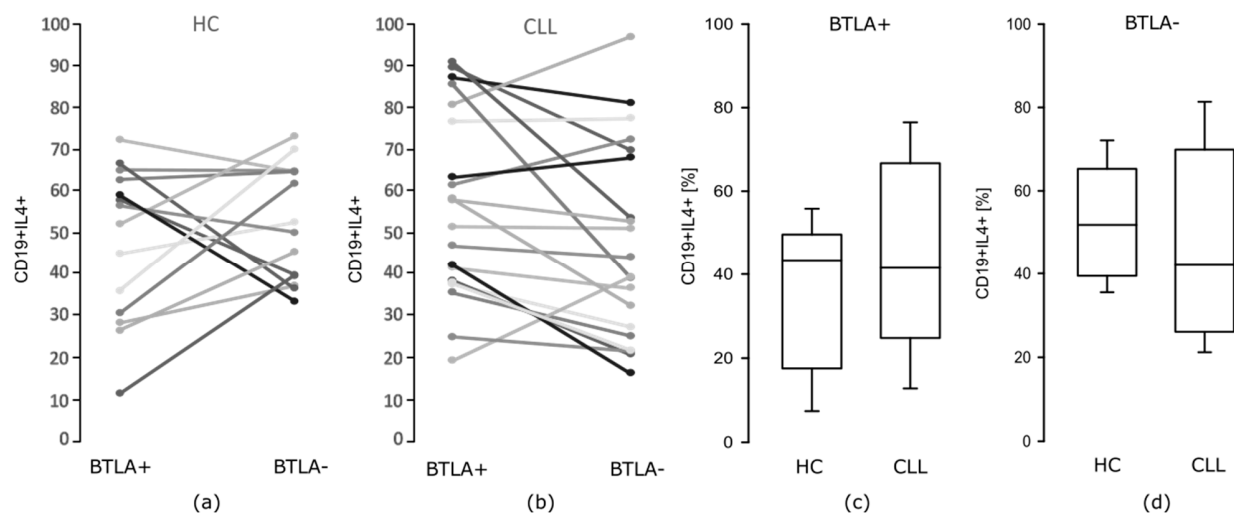

**Figure S2.** The proportion of BTLA positive and negative cells expressing Ki67 in B cell compartment.
